# Supplementary material
Source: Springer Nature journal article supplement (https://www.springermedizin.de/resource/supplementary/12936_2010_1254_MOESM1_ESM.pdf/9549338)

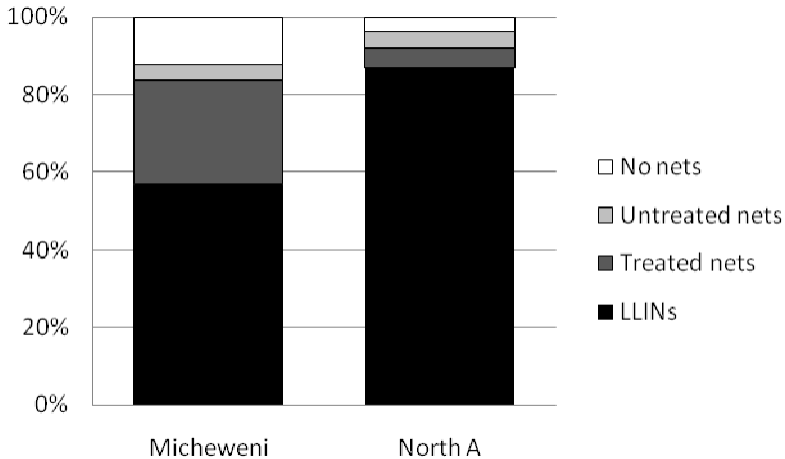

Supplement: MOESM1 [file 9549338]
